# Supplementary material for: Analysis of the Genomic Landscape in ALK+ NSCLC Patients Identifies Novel Aberrations Associated with Clinical Outcomes
Source: Oxford University Press journal article supplement (doi:10.1158/1535-7163.mct-19-0105), 2019-06-26
Supplement: 15357163mct190105-sup-216313_2_supp_5534518_prtfks.docx [file 15357163mct190105-sup-216313_2_supp_5534518_prtfks.docx]

Supplementary Table 3: Summary of the number of events by patient.

| Patient ID | Response | Time | EML4 Fusion | Mutation | Gain | Loss | High copy gain | Deletion |
| --- | --- | --- | --- | --- | --- | --- | --- | --- |
| 004 | PD | Pre  Post | yes | 136  106 | 150  160 | 207  182 | 30  40 | 11  9 |
| 007 | SD | Pre | yes | 45 | 112 | 218 | 0 | 0 |
| 011 | PD | Pre  Post | yes | 28  27 | 179  457 | 242  542 | 27  34 | 0  0 |
| 013 | PR | Post | no | 29 | 267 | 296 | 11 | 28 |
| 015 | PR | Pre | no | 190 | 171 | 275 | 18 | 25 |
| 016 | SD | Pre | yes | 29 | 298 | 418 | 5 | 5 |
| 017 | SD | Pre | yes | 641 | 96 | 103 | 6 | 3 |
| 018 | PR | Pre | yes | 92 | 119 | 177 | 14 | 6 |
| 021 | Unk | Pre | no | 433 | 227 | 344 | 10 | 3 |
| 022 | PD | Pre | yes | 76 | 71 | 104 | 5 | 1 |
| 025 | SD | Pre | no | 188 | 124 | 156 | 20 | 10 |
