# Supplementary material for: Analysis of the Genomic Landscape in ALK+ NSCLC Patients Identifies Novel Aberrations Associated with Clinical Outcomes
Source: Oxford University Press journal article supplement (doi:10.1158/1535-7163.mct-19-0105), 2019-06-26
Supplement: 15357163mct190105-sup-216313_2_supp_5534520_prtxks.docx [file 15357163mct190105-sup-216313_2_supp_5534520_prtxks.docx]

| **Supplementary Table1: Best overall response and response rate** | |
| --- | --- |
|  | **Genomic cohort**  **(n=12)** | | **Entire Cohort**  **(n=24)** |
| **Best overall response – n(%)** |  | |  |
| Complete response | 0 | | 0 |
| Partial response | 3(25) | | 6 (25) |
| Stable disease | 4(33.3) | | 9(37.5) |
| Progressive disease | 4(33.3) | | 5(20.8) |
| Not applicable | 1(8.3) | | 3(12.5) |
| TBD | 0 | | 1(4.2) |
| **Response rates – n(%)** |  | |  |
| Clinical benefit rate | 7(58.3) | | 15(62.5) |
| Objective response rate | 2(25) | | 6(25) |
