# Supplementary material for: Analysis of the Genomic Landscape in ALK+ NSCLC Patients Identifies Novel Aberrations Associated with Clinical Outcomes
Source: Oxford University Press journal article supplement (doi:10.1158/1535-7163.mct-19-0105), 2019-06-26
Supplement: 15357163mct190105-sup-216313_2_supp_5534521_prt3ks.xlsx [file 15357163mct190105-sup-216313_2_supp_5534521_prt3ks.xlsx]

## Sheet: Sheet1
Genomic coordinate for custom baits design hg19.
Chr	start	end	Gene
chr1	186324900	186325417	TPR
chr2	32641231	32654213	BIRC6
chr2	37132761	37143220	STRN
chr2	46926250	46985657	SOCS5
chr2	29338531	29344239	CLIP4
chr2	29344387	29354123	CLIP4
chr2	29354263	29355017	CLIP4
chr2	29355111	29356520	CLIP4
chr2	29356682	29358413	CLIP4
chr2	29358532	29366574	CLIP4
chr2	29366811	29368097	CLIP4
chr2	29368233	29375550	CLIP4
chr2	29375694	29379219	CLIP4
chr2	29379309	29380069	CLIP4
chr2	29380213	29383198	CLIP4
chr2	29383333	29386696	CLIP4
chr2	29386820	29390341	CLIP4
chr2	29390406	29397238	CLIP4
chr2	29397311	29404437	CLIP4
chr2	29448431	29449787	ALK
chr2	29446394	29448326	ALK
chr2	42472827	42483640	EML4
chr2	42491871	42507989	EML4
chr2	42522656	42528380	EML4
chr2	42528532	42530243	EML4
chr2	42530369	42530454	EML4
chr2	42530500	42531691	EML4
chr2	42543190	42544566	EML4
chr2	42552694	42553293	EML4
chr3	100447702	100451351	TFG
chr7	75182888	75183411	HIP1
chr7	75171299	75172169	HIP1
chr7	75167545	75168642	HIP1
chr10	32311964	32317355	KIF5B
chr10	32310215	32311067	KIF5B
chr10	32304587	32306070	KIF5B
chr14	104141938	104142025	KLC1
