# Supplementary material for: Analysis of the Genomic Landscape in ALK+ NSCLC Patients Identifies Novel Aberrations Associated with Clinical Outcomes
Source: Oxford University Press journal article supplement (doi:10.1158/1535-7163.mct-19-0105), 2019-06-26
Supplement: 15357163mct190105-sup-216313_2_supp_5534522_prtqks.xlsx [file 15357163mct190105-sup-216313_2_supp_5534522_prtqks.xlsx]

## Sheet: result_PFS_associatedRegions_n9
Region	Event	# Patients with SCNA (In)	In Median	# Patients without (Out)	Out Median	P-Value	Gene Symbols
chr4:183,549,846-184,616,629	CN Gain	5	22.4	4	1.6	0.00294401	TENM3, DCTD, FAM92A1P2, WWC2-AS2, WWC2, WWC2-AS1, CLDN22, CLDN24, CDKN2AIP, LOC389247, ING2, RWDD4, TRAPPC11
chr4:186,272,784-186,295,411	CN Gain	5	22.4	4	1.6	0.00294401	SNX25, LRP2BP
chr4:41,496,634-41,511,536	CN Gain	5	22.4	4	1.6	0.00294401	LIMCH1
chr2:29,449,877-29,450,129	CN Loss	4	1.6	5	22.4	0.00294401	ALK
chr13:80,171,321-87,821,320	CN Gain	3	1.6	6	18.7	0.00329759	LINC01038, LINC00382, LINC01080, SPRY2, LINC00377, LINC00564, SLITRK1, LINC00333, SNORA107, LINC00375, LINC00351, SLITRK6, LINC00430
chr13:88,330,123-94,938,639	CN Gain	3	1.6	6	18.7	0.00329759	SLITRK5, LINC00397, LOC105370306, LINC00433, LINC00560, LINC01047, LINC00440, LINC01040, LINC00353, LINC00559, MIR622, LINC01049, LINC00410, LINC00380, LINC00379, MIR17, MIR18A, MIR19A, MIR20A, MIR17HG, MIR19B1, MIR92A1, GPC5, GPC5-AS2, MIR548AS, GPC5-AS1, LINC00363, GPC6, GPC6-AS2, GPC6-AS1
chr19:58,981,860-58,996,489	CN Gain	3	1.6	6	18.7	0.00329759	ZNF324, ZNF446
chr22:21,371,386-21,435,063	CN Loss	3	1.6	6	18.7	0.00329759	P2RX6, SLC7A4, MIR649, P2RX6P, LRRC74B
chr4:122,997,477-123,558,785	CN Loss	3	1.6	6	18.7	0.00329759	KIAA1109, ADAD1, IL2, IL21, IL21-AS1
chr4:69,885,502-71,509,541	CN Loss	3	1.6	6	18.7	0.00329759	UGT2B10, UGT2B7, LOC105377267, UGT2B11, UGT2B28, UGT2B4, UGT2A2, UGT2A1, SULT1B1, SULT1E1, CSN1S1, CSN2, STATH, HTN3, HTN1, CSN1S2AP, CSN1S2BP, PRR27, ODAM, FDCSP, CSN3, CABS1, SMR3A, SMR3B, OPRPN, MUC7, AMTN, AMBN, ENAM
chr2:46,998,275-47,000,700	CN Gain	4	22.4	5	1.6	0.00464631
chr4:37,436,591-38,722,283	CN Gain	4	22.4	5	1.6	0.00464631	NWD2, C4orf19, RELL1, PGM2, PTTG2, TBC1D1, LINC02513, LINC01258, LINC01259, LINC02278, KLF3-AS1, KLF3
chr4:40,133,567-40,154,328	CN Gain	4	22.4	5	1.6	0.00464631	N4BP2
chr2:111,551,395-112,702,691	CN Gain	3	29.5	6	1.6	0.0101343	ACOXL, ACOXL-AS1, BCL2L11, MIR4435-2, MIR4435-1, MIR4435-2HG, MIR4771-1, MIR4771-2, ANAPC1, MERTK
chr2:152,120,051-152,313,082	CN Gain	3	29.5	6	1.6	0.0101343	NMI, LOC101929319, MIR4773-1, MIR4773-2, TNFAIP6, RIF1
chr2:32,631,473-32,641,040	CN Gain	3	29.5	6	1.6	0.0101343	BIRC6
chr2:37,157,851-37,193,314	CN Gain	3	29.5	6	1.6	0.0101343	STRN
chr1:228,401,217-228,404,738	CN Loss	3	29.5	6	1.6	0.0101343	OBSCN-AS1, OBSCN
chr15:25,584,364-25,616,708	CN Loss	6	1.6	3	29.5	0.0101343	SNHG14, UBE3A
chr17:19,448,681-19,646,516	CN Loss	6	1.6	3	29.5	0.0101343	SLC47A1, SNORA59A, SNORA59B, ALDH3A2, SLC47A2, ALDH3A1
chr18:67,315,037-67,849,692	CN Loss	6	1.6	3	29.5	0.0101343	DOK6, CD226, RTTN
chr7:83,034,652-83,101,169	CN Loss	3	29.5	6	1.6	0.0101343	SEMA3E
chr8:110,744,092-110,980,559	CN Loss	3	29.5	6	1.6	0.0101343	KCNV1
chr13:103,718,470-108,183,479	CN Gain	2	1.5	7	18.7	0.0109248	SLC10A2, LINC01309, DAOA, DAOA-AS1, LINC00343, LINC00460, EFNB2, ARGLU1, LINC00551, LINC00443, SNORD31B, FAM155A
chr13:58,016,198-74,985,685	CN Gain	2	1.5	7	18.7	0.0109248	PCDH17, LINC02338, LINC00374, DIAPH3, DIAPH3-AS1, DIAPH3-AS2, LINC00434, TDRD3, LINC00378, MIR3169, PCDH20, LINC02339, LINC00358, LINC01075, LINC01074, LINC00459, LINC00448, LINC00376, LINC00395, OR7E156P, LOC102723968, LINC00355, LINC01052, MIR548X2, MIR4704, PCDH9, PCDH9-AS2, PCDH9-AS3, PCDH9-AS4, LINC00364, LINC00550, LINC00383, KLHL1, ATXN8OS, LINC00348, DACH1, MZT1, BORA, DIS3, PIBF1, KLF5, …
chr14:88,245,879-88,336,195	CN Gain	2	1.5	7	18.7	0.0109248
chr6:139,503,767-142,290,117	CN Gain	2	1.5	7	18.7	0.0109248	TXLNB, CITED2, LINC01625, FILNC1, LOC103352541, LOC100507477, MIR3668, MIR4465
chr9:32,009,824-32,295,472	CN Gain	2	1.5	7	18.7	0.0109248
chr1:16,884,259-16,888,402	CN Loss	2	1.5	7	18.7	0.0109248
chr1:78,043,437-78,478,868	CN Loss	2	1.5	7	18.7	0.0109248	ZZZ3, USP33, MIGA1, NEXN-AS1, NEXN, FUBP1, DNAJB4
chr1:84,355,085-87,393,905	CN Loss	2	1.5	7	18.7	0.0109248	TTLL7, PRKACB, SAMD13, UOX, DNASE2B, RPF1, GNG5, SPATA1, CTBS, LINC01461, LINC01555, SSX2IP, LPAR3, MCOLN2, MCOLN3, WDR63, MIR4423, SYDE2, C1orf52, BCL10, LOC646626, DDAH1, CYR61, ZNHIT6, COL24A1, MIR7856, ODF2L, CLCA2, CLCA1, CLCA4, LOC105378828, CLCA3P, SH3GLB1, SELENOF, HS2ST1
chr1:91,404,952-93,309,653	CN Loss	2	1.5	7	18.7	0.0109248	ZNF644, HFM1, CDC7, TGFBR3, BRDT, EPHX4, SETSIP, BTBD8, KIAA1107, C1orf146, GLMN, RPAP2, GFI1, EVI5, RPL5, SNORD21, SNORA66, FAM69A
chr10:42,644,881-43,375,082	CN Loss	2	1.5	7	18.7	0.0109248	LOC441666, CCNYL2, LINC00839, ZNF37BP, ZNF33B, LINC01518, LOC283028, LOC105378269, BMS1, LOC101929445
chr10:46,070,533-46,958,784	CN Loss	2	1.5	7	18.7	0.0109248	MARCH8, ZFAND4, WASHC2C, FAM25E, AGAP4, PTPN20, FRMPD2B, BMS1P1, FAM35BP, LOC102724593, SYT15
chr10:69,106,500-70,045,038	CN Loss	2	1.5	7	18.7	0.0109248	CTNNA3, MIR7151, DNAJC12, SIRT1, HERC4, POU5F1P5, MYPN, ATOH7, PBLD
chr10:70,733,392-70,998,656	CN Loss	2	1.5	7	18.7	0.0109248	DDX21, KIF1BP, SRGN, VPS26A, SUPV3L1, LOC101928994, HKDC1
chr12:20,791,417-22,078,090	CN Loss	2	1.5	7	18.7	0.0109248	PDE3A, SLCO1C1, SLCO1B3, SLCO1B7, SLCO1B1, SLCO1A2, IAPP, PYROXD1, RECQL, GOLT1B, SPX, GYS2, LDHB, KCNJ8, ABCC9
chr18:10,682,130-12,250,653	CN Loss	2	1.5	7	18.7	0.0109248	MIR6788, PIEZO2, LINC01928, LINC01255, SLC35G4, MIR7153, GNAL, CHMP1B, MPPE1, IMPA2, ANKRD62, C18orf61
chr18:12,326,020-12,358,834	CN Loss	2	1.5	7	18.7	0.0109248	TUBB6, AFG3L2
chr19:19,869,125-22,034,745	CN Loss	2	1.5	7	18.7	0.0109248	LINC00663, ZNF56, ZNF506, ZNF253, ZNF93, ZNF682, ZNF90, ZNF486, MIR1270, MIR1270, ZNF826P, ZNF737, ZNF626, ZNF66, ZNF85, ZNF430, ZNF714, ZNF431, ZNF708, ZNF738, ZNF493, LINC00664, ZNF429, LOC400682, ZNF100, LOC641367, ZNF43
chr2:109,006,537-109,351,920	CN Loss	2	1.5	7	18.7	0.0109248	GCC2, GCC2-AS1, LIMS1, LIMS1-AS1, RANBP2
chr2:20,870,385-20,870,940	CN Loss	2	1.5	7	18.7	0.0109248	GDF7
chr2:32,640,559-32,641,040	CN Loss	2	1.5	7	18.7	0.0109248	BIRC6
chr2:37,076,708-37,133,401	CN Loss	2	1.5	7	18.7	0.0109248	STRN
chr20:35,261,905-35,807,651	CN Loss	2	1.5	7	18.7	0.0109248	SLA2, NDRG3, DSN1, SOGA1, TLDC2, SAMHD1, RBL1, MROH8, RPN2
chr22:24,979,527-25,251,441	CN Loss	2	1.5	7	18.7	0.0109248	LRRC75B, GGT1, BCRP3, POM121L10P, PIWIL3, TOP1P2, SGSM1
chr5:89,924,421-90,281,281	CN Loss	2	1.5	7	18.7	0.0109248	ADGRV1
chr9:124,966,843-124,989,744	CN Loss	2	1.5	7	18.7	0.0109248	LHX6
chr9:125,922,515-126,088,435	CN Loss	2	1.5	7	18.7	0.0109248	STRBP
chr9:127,688,947-128,117,878	CN Loss	2	1.5	7	18.7	0.0109248	GOLGA1, SCAI, PPP6C, LOC105376271, RABEPK, HSPA5, GAPVD1
chr9:130,931,043-131,388,986	CN Loss	2	1.5	7	18.7	0.0109248	CIZ1, DNM1, MIR199B, MIR3154, GOLGA2, SWI5, TRUB2, COQ4, SLC27A4, URM1, MIR219B, MIR219A2, CERCAM, ODF2, MIR1268A, GLE1, SPTAN1
chr9:134,001,045-134,023,686	CN Loss	2	1.5	7	18.7	0.0109248	NUP214
chr9:135,095,760-135,917,746	CN Loss	2	1.5	7	18.7	0.0109248	NTNG2, SETX, TTF1, CFAP77, BARHL1, DDX31, GTF3C4, AK8, SPACA9, TSC1, MIR548AW, GFI1B, SNORD141A, SNORD141B, LOC105376306, GTF3C5
chr9:135,979,970-136,176,417	CN Loss	2	1.5	7	18.7	0.0109248	RALGDS, GBGT1, OBP2B, ABO
chr9:84,487,181-84,528,461	CN Loss	2	1.5	7	18.7	0.0109248	SPATA31D5P
chr9:94,794,720-94,952,634	CN Loss	2	1.5	7	18.7	0.0109248	SPTLC1, LOC100128076, LINC00475, PRSS47
chr9:95,276,926-95,682,441	CN Loss	2	1.5	7	18.7	0.0109248	CENPP, ECM2, MIR4670, LOC100128361, IPPK, BICD2, LOC101929748, ANKRD19P, ZNF484, LOC642943
chr1:228,473,763-228,479,698	CN Loss	5	22.4	4	1.6	0.0122303	OBSCN
chr6:39,883,902-40,998,360	CN Loss	5	22.4	4	1.6	0.0122303	MOCS1, LINC00951, TDRG1, LRFN2, LOC101929555, UNC5CL
chr16:16,368,848-16,376,835	CN Gain	6	18.7	3	1.6	0.0154847	NOMO3
chr9:84,677,071-85,047,829	CN Loss	3	1.6	6	18.7	0.0154847
chr9:90,747,428-90,748,539	CN Loss	3	1.6	6	18.7	0.0154847	SPATA31C2
chr7:19,116,776-20,103,338	CN Gain	5	1.6	4	22.4	0.0170909	TWIST1, FERD3L, TWISTNB, MIR3146, TMEM196, LOC101927668
chr7:35,426,160-36,376,420	CN Gain	5	1.6	4	22.4	0.0170909	HERPUD2, LOC101930085, LOC100506725, SEPT7-AS1, SEPT7, LOC101928618, EEPD1, KIAA0895
chr7:38,936,986-38,937,766	CN Gain	5	1.6	4	22.4	0.0170909	VPS41
chr7:7,646,571-8,272,207	CN Gain	5	1.6	4	22.4	0.0170909	MIOS, RPA3, UMAD1, LOC100505921, GLCCI1, ICA1
chr14:31,059,817-31,085,887	CN Gain	5	22.4	4	1.6	0.0252285	G2E3
chr16:625,391-633,530	CN Gain	5	22.4	4	1.6	0.0252285	PIGQ
chr2:110,571,125-111,291,038	CN Gain	5	22.4	4	1.6	0.0252285	RGPD5, RGPD6, LIMS3, LIMS4, LIMS3-LOC440895, LOC440895, LOC100288570, LINC01123, MIR4267, MIR4436B1, MIR4436B2, MALL, NPHP1, SMIM37, LOC100507334, MIR4436B1, MIR4436B2, LINC01106, LINC01123, LOC440895, LOC100288570, LIMS3-LOC440895, LIMS3, LIMS4, RGPD6, RGPD5
chr5:136,971,611-137,781,035	CN Gain	5	22.4	4	1.6	0.0252285	MIR874, KLHL3, HNRNPA0, NPY6R, MYOT, PKD2L2, FAM13B, LOC100130172, WNT8A, NME5, BRD8, KIF20A, CDC23, GFRA3, CDC25C, LOC100128966, FAM53C, KDM3B, REEP2
chr10:32,319,615-32,324,384	CN Loss	4	1.6	5	22.4	0.0252285	KIF5B
chr13:39,254,562-39,262,432	CN Loss	5	22.4	4	1.6	0.0252285	LINC00437, FREM2
chr18:28,580,567-28,584,175	CN Loss	4	1.6	5	22.4	0.0252285	DSC3
chr18:44,015,301-44,015,453	CN Loss	4	1.6	5	22.4	0.0252285	RNF165
chr19:54,724,511-54,866,836	CN Loss	5	22.4	4	1.6	0.0252285	LILRB3, LILRA6, LILRB5, LILRB2, MIR4752, LILRA3, LILRA5, LILRA4, LAIR1
chr9:19,050,505-19,058,077	CN Loss	4	1.6	5	22.4	0.0252285	RRAGA, HAUS6
chr9:26,917,071-27,286,150	CN Loss	4	1.6	5	22.4	0.0252285	PLAA, IFT74-AS1, LRRC19, IFT74, TEK, LINC00032, EQTN
chr1:12,884,889-13,368,463	CN Loss	7	6	2	29.5	0.0282498	PRAMEF11, HNRNPCL4, HNRNPCL3, HNRNPCL1, PRAMEF2, PRAMEF4, PRAMEF7, PRAMEF8, PRAMEF27, PRAMEF9, PRAMEF6, PRAMEF18, PRAMEF25, PRAMEF26, PRAMEF5, PRAMEF34P, PRAMEF36P, HNRNPCL2, PRAMEF34P, PRAMEF36P, PRAMEF6, PRAMEF5, PRAMEF27, PRAMEF22, PRAMEF18
chr17:10,535,985-10,634,466	CN Loss	7	6	2	29.5	0.0282498	MYH3, SCO1, ADPRM, MAGOH2P, TMEM220, TMEM220-AS1
chr17:11,361,484-11,572,434	CN Loss	7	6	2	29.5	0.0282498	SHISA6, DNAH9
chr19:54,124,538-54,257,190	CN Loss	7	6	2	29.5	0.0282498	DPRX, MIR512-1, MIR512-2, MIR512-1, MIR512-2, MIR1323, MIR498, MIR520E, MIR515-1, MIR515-2, MIR519E, MIR520F, MIR515-1, MIR515-2, MIR519C, MIR1283-1, MIR520A, MIR526B, MIR519B, MIR525, MIR523, MIR518F, MIR520B, MIR518B, MIR526A1, MIR520C, MIR518C, MIR524, MIR517A, MIR519D, MIR521-2, MIR520D, MIR517B, MIR520G, MIR516B2, MIR526A2, MIR518E, MIR518A1, MIR518D, MIR516B1, MIR518A2, MIR517C, MIR520H, MI…
chr1:39,653,978-39,719,722	CN Gain	2	29.5	7	6	0.0282498	MACF1
chr10:129,914,042-129,921,205	CN Gain	2	29.5	7	6	0.0282498	MKI67
chr11:30,914,363-31,857,461	CN Gain	2	29.5	7	6	0.0282498	DCDC1, DNAJC24, IMMP1L, ELP4, PAX6, PAUPAR, PAX6-AS1
chr11:32,595,744-33,373,227	CN Gain	2	29.5	7	6	0.0282498	EIF3M, CCDC73, PRRG4, QSER1, DEPDC7, TCP11L1, LINC00294, CSTF3, CSTF3-AS1, HIPK3
chr11:44,069,641-44,089,258	CN Gain	2	29.5	7	6	0.0282498	ACCSL, ACCS
chr11:48,164,549-48,238,620	CN Gain	2	29.5	7	6	0.0282498	PTPRJ, OR4B1
chr11:987,278-1,018,979	CN Gain	2	29.5	7	6	0.0282498	AP2A2, MUC6
chr12:7,680,593-9,073,488	CN Gain	2	29.5	7	6	0.0282498	APOBEC1, GDF3, DPPA3, CLEC4C, NANOGNB, NANOG, SLC2A14, SLC2A3, FOXJ2, C3AR1, NECAP1, CLEC4A, POU5F1P3, ZNF705A, FAM66C, FAM90A1, FAM86FP, LINC02449, LINC00937, CLEC6A, CLEC4D, CLEC4E, AICDA, MFAP5, RIMKLB, A2ML1, PHC1
chr14:105,920,446-105,930,722	CN Gain	2	29.5	7	6	0.0282498	MTA1
chr19:52,443,971-52,709,044	CN Gain	2	29.5	7	6	0.0282498	ZNF613, ZNF350-AS1, ZNF350, ZNF615, ZNF614, ZNF432, ZNF841, ZNF616, ZNF836, PPP2R1A
chr2:15,372,597-15,840,389	CN Gain	2	29.5	7	6	0.0282498	NBAS, DDX1, LINC01804
chr2:21,365,360-21,426,461	CN Gain	2	29.5	7	6	0.0282498	TDRD15
chr2:237,994,474-238,241,836	CN Gain	2	29.5	7	6	0.0282498	COPS8, COL6A3
chr2:37,004,370-37,134,278	CN Gain	2	29.5	7	6	0.0282498	VIT, STRN
chr21:26,976,288-27,484,344	CN Gain	2	29.5	7	6	0.0282498	MRPL39, JAM2, ATP5PF, GABPA, APP
chr21:30,255,095-31,538,333	CN Gain	2	29.5	7	6	0.0282498	N6AMT1, LTN1, RWDD2B, USP16, CCT8, MAP3K7CL, LINC00189, BACH1, BACH1-IT2, BACH1-IT3, GRIK1-AS2, GRIK1, GRIK1-AS1, CLDN17
chr21:32,692,395-34,618,382	CN Gain	2	29.5	7	6	0.0282498	TIAM1, LOC150051, SOD1, SCAF4, HUNK, LINC00159, MIS18A, MRAP, URB1, SNORA80A, URB1-AS1, EVA1C, TCP10L, C21orf59-TCP10L, C21orf59, SYNJ1, PAXBP1-AS1, PAXBP1, C21orf62-AS1, C21orf62, LINC01690, OLIG2, LINC00945, OLIG1, LOC101928107, LINC01548, IFNAR2
chr22:50,664,941-50,752,497	CN Gain	2	29.5	7	6	0.0282498	TUBGCP6, HDAC10, MAPK12, MAPK11, PLXNB2, DENND6B
chr4:15,480,383-15,739,340	CN Gain	2	29.5	7	6	0.0282498	CC2D2A, FBXL5, FAM200B, BST1
chr4:48,636,267-49,094,352	CN Gain	2	29.5	7	6	0.0282498	FRYL, OCIAD1, OCIAD1-AS1, OCIAD2, CWH43
chr6:10,368,964-11,198,444	CN Gain	2	29.5	7	6	0.0282498	TFAP2A-AS2, TFAP2A, TFAP2A-AS1, LINC00518, MIR5689, MIR5689HG, GCNT2, C6orf52, PAK1IP1, TMEM14C, TMEM14B, MAK, GCM2, SYCP2L, LOC101928191, ELOVL2, ELOVL2-AS1, ERVFRD-1, SMIM13, NEDD9
chr6:28,379,612-28,542,555	CN Gain	2	29.5	7	6	0.0282498	ZSCAN23, GPX6, GPX5, ZBED9
chr6:7,269,251-8,102,803	CN Gain	2	29.5	7	6	0.0282498	SSR1, CAGE1, RIOK1, DSP, SNRNP48, BMP6, TXNDC5, BLOC1S5-TXNDC5, PIP5K1P1, BLOC1S5, EEF1E1-BLOC1S5, SCARNA27, EEF1E1
chr7:144,173,356-144,423,762	CN Gain	2	29.5	7	6	0.0282498	TPK1
chr7:151,800,209-151,810,359	CN Gain	2	29.5	7	6	0.0282498	GALNT11
chr1:112,329,767-113,012,295	CN Loss	2	29.5	7	6	0.0282498	KCND3-IT1, KCND3, KCND3-AS1, LINC01750, CTTNBP2NL, MIR4256, WNT2B
chr1:238,088,544-238,101,272	CN Loss	2	29.5	7	6	0.0282498	LOC100130331
chr14:25,103,367-25,139,114	CN Loss	2	29.5	7	6	0.0282498	GZMB
chr17:73,987,665-74,541,086	CN Loss	2	29.5	7	6	0.0282498	TEN1, TEN1-CDK3, MIR4538, CDK3, EVPL, SRP68, GALR2, ZACN, EXOC7, MIR6868, FOXJ1, RNF157-AS1, RNF157, UBALD2, QRICH2, PRPSAP1, SPHK1, UBE2O, AANAT, RHBDF2, CYGB, PRCD
chr19:11,141,581-11,277,222	CN Loss	2	29.5	7	6	0.0282498	SMARCA4, LDLR, MIR6886, SPC24, KANK2
chr19:11,354,403-11,492,386	CN Loss	2	29.5	7	6	0.0282498	DOCK6, TSPAN16, RAB3D, TMEM205, CCDC159, PLPPR2, SWSAP1, EPOR
chr19:13,879,393-13,985,441	CN Loss	2	29.5	7	6	0.0282498	MRI1, C19orf53, ZSWIM4, LOC284454, MIR24-2, MIR27A, MIR23A, NANOS3
chr19:38,869,925-38,934,895	CN Loss	2	29.5	7	6	0.0282498	PSMD8, GGN, SPRED3, FAM98C, RASGRP4, RYR1
chr19:39,019,033-39,435,764	CN Loss	2	29.5	7	6	0.0282498	RYR1, LOC105372397, MAP4K1, EIF3K, ACTN4, CAPN12, LGALS7, LGALS7B, LGALS4, ECH1, HNRNPL, RINL, SIRT2, NFKBIB, CCER2, SARS2, MRPS12, FBXO17
chr19:40,630,452-40,882,636	CN Loss	2	29.5	7	6	0.0282498	MAP3K10, TTC9B, CNTD2, AKT2, MIR641, C19orf47, PLD3, MIR6796
chr19:40,902,803-41,066,413	CN Loss	2	29.5	7	6	0.0282498	PRX, SERTAD1, SERTAD3, BLVRB, SPTBN4
chr19:45,852,139-45,901,276	CN Loss	2	29.5	7	6	0.0282498	KLC3, ERCC2, PPP1R13L
chr19:54,947,570-54,976,526	CN Loss	2	29.5	7	6	0.0282498	TTYH1, LENG8-AS1, LENG8, LENG9, CDC42EP5
chr21:46,126,981-46,127,650	CN Loss	2	29.5	7	6	0.0282498	TSPEAR
chr4:100,575,372-100,640,223	CN Loss	2	29.5	7	6	0.0282498	LOC285556
chr7:100,803,651-100,883,442	CN Loss	2	29.5	7	6	0.0282498	AP1S1, VGF, NAT16, MOGAT3, PLOD3, ZNHIT1, CLDN15, FIS1
chr7:151,969,999-151,981,281	CN Loss	2	29.5	7	6	0.0282498	KMT2C
chr7:45,118,742-47,317,608	CN Loss	2	29.5	7	6	0.0282498	NACAD, SNORA5A, SNORA5C, TBRG4, SNORA5B, RAMP3, ADCY1, SEPT7P2, LOC730234, IGFBP1, IGFBP3, LOC730338, TNS3
chr7:48,961,956-48,968,899	CN Loss	2	29.5	7	6	0.0282498	CDC14C
chr7:73,152,200-73,152,404	CN Loss	2	29.5	7	6	0.0282498	ABHD11
chr12:113,872,028-113,922,759	CN Loss	4	22.4	5	1.6	0.0325241	SDSL, LHX5, LHX5-AS1
chr19:9,407,252-9,869,436	CN Loss	5	1.6	4	22.4	0.0325241	ZNF699, ZNF559, ZNF559-ZNF177, ZNF177, ZNF266, ZNF560, ZNF426, ZNF426-DT, ZNF121, ZNF561, ZNF561-AS1, ZNF562, ZNF812P, ZNF846
chr22:17,071,698-17,072,280	CN Loss	6	1.6	3	29.5	0.0351787	CCT8L2
chr4:13,572,004-13,616,999	CN Gain	3	29.5	6	1.6	0.0351787	BOD1L1
chr4:187,629,926-187,639,570	CN Gain	3	29.5	6	1.6	0.0351787	FAT1
chr4:20,490,196-20,800,433	CN Gain	3	29.5	6	1.6	0.0351787	SLIT2, MIR218-1, PACRGL, KCNIP4
chr1:241,653,497-241,657,556	CN Loss	3	29.5	6	1.6	0.0351787
chr13:38,347,585-39,218,647	CN Loss	3	29.5	6	1.6	0.0351787	TRPC4, LINC00571, UFM1, LINC00366, LINC00437
chr19:35,090,243-35,170,780	CN Loss	3	29.5	6	1.6	0.0351787	SCGB1B2P, SCGB2B3P, ZNF302
chr6:142,271,486-142,290,117	CN Loss	3	29.5	6	1.6	0.0351787
chr6:147,181,932-147,830,533	CN Loss	3	29.5	6	1.6	0.0351787	STXBP5-AS1, LUADT1, STXBP5, SAMD5
chr14:82,577,543-88,097,863	CN Gain	4	1.6	5	22.4	0.0399261	LINC02301, SNORD3P3, LINC02329, LINC00911, FLRT2, LINC02328, LINC01148
chr6:28,554,178-28,770,462	CN Gain	5	22.4	4	1.6	0.0399261	ZBED9, LINC00533
chr7:12,727,919-16,381,809	CN Gain	4	1.6	5	22.4	0.0399261	ARL4A, ETV1, DGKB, AGMO, MEOX2, LOC105375166, MEOX2-AS1, ISPD-AS1, ISPD
chr7:41,962,388-42,088,048	CN Gain	4	1.6	5	22.4	0.0399261	GLI3
chr7:43,482,014-43,790,835	CN Gain	4	1.6	5	22.4	0.0399261	HECW1, LUARIS, STK17A, COA1
chr7:50,218,866-55,713,422	CN Gain	4	1.6	5	22.4	0.0399261	IKZF1, FIGNL1, DDC, DDC-AS1, GRB10, COBL, POM121L12, LINC01446, HPVC1, LINC01445, VSTM2A, VSTM2A-OT1, SEC61G, LOC100996654, EGFR, EGFR-AS1, ELDR, LANCL2, VOPP1
chr14:77,579,766-77,580,130	CN Gain	3	1.6	6	18.7	0.0451158	CIPC
chr19:36,230,968-36,249,272	CN Gain	3	1.6	6	18.7	0.0451158	IGFLR1, U2AF1L4, PSENEN, LIN37, HSPB6, PROSER3
chr3:50,340,194-50,396,184	CN Gain	3	1.6	6	18.7	0.0451158	HYAL1, HYAL2, TUSC2, RASSF1, RASSF1-AS1, ZMYND10, NPRL2, TMEM115, CYB561D2
chr1:13,839,932-13,916,218	CN Loss	3	1.6	6	18.7	0.0451158	LRRC38, PDPN
chr11:117,265,606-117,311,029	CN Loss	3	1.6	6	18.7	0.0451158	CEP164, DSCAML1
chr12:132,984,142-133,196,025	CN Loss	3	1.6	6	18.7	0.0451158	FBRSL1, MIR6763, LRCOL1, P2RX2
chr12:133,254,099-133,255,150	CN Loss	3	1.6	6	18.7	0.0451158	POLE
chr14:101,514,939-102,028,621	CN Loss	3	1.6	6	18.7	0.0451158	MIR381HG, MIR544A, MIR655, MIR487A, MIR382, MIR134, MIR668, MIR485, MIR323B, MIR154, MIR496, MIR377, MIR541, MIR409, MIR412, MIR369, MIR410, MIR656, MEG9, LINC02285, LINC00524, LINC02314, DIO3OS, MIR1247, DIO3
chr15:25,653,794-26,027,498	CN Loss	3	1.6	6	18.7	0.0451158	SNHG14, UBE3A, ATP10A
chr16:22,545,032-23,080,687	CN Loss	3	1.6	6	18.7	0.0451158	NPIPB5, LOC653786, HS3ST2, USP31
chr16:24,869,956-25,327,266	CN Loss	3	1.6	6	18.7	0.0451158	SLC5A11, ARHGAP17, LOC554206, LINC02175, LCMT1-AS1, LCMT1-AS2, LCMT1, AQP8, ZKSCAN2
chr16:32,840,013-33,262,726	CN Loss	3	1.6	6	18.7	0.0451158	SLC6A10P, TP53TG3C, TP53TG3, TP53TG3B, TP53TG3F, TP53TG3E, TP53TG3C, TP53TG3, TP53TG3B, TP53TG3F, TP53TG3E
chr16:47,733,212-48,180,348	CN Loss	3	1.6	6	18.7	0.0451158	PHKB, LINC02192, LINC02133, LINC02134, ABCC12
chr16:58,710,002-58,721,178	CN Loss	3	1.6	6	18.7	0.0451158	SLC38A7
chr16:70,104,356-70,161,246	CN Loss	3	1.6	6	18.7	0.0451158	PDPR
chr16:81,284,723-81,303,869	CN Loss	3	1.6	6	18.7	0.0451158	BCO1
chr4:118,924,802-119,059,150	CN Loss	3	1.6	6	18.7	0.0451158	NDST3
chr4:49,039,196-49,094,168	CN Loss	3	1.6	6	18.7	0.0451158	CWH43
chr8:10,587,819-12,010,582	CN Loss	3	1.6	6	18.7	0.0451158	SOX7, LOC102723313, PINX1, MIR1322, LOC101929229, MIR598, XKR6, LOC101929269, MTMR9, SLC35G5, LOC100129129, TDH, FAM167A-AS1, FAM167A, BLK, LINC00208, SNORA99, GATA4, C8orf49, NEIL2, FDFT1, CTSB, DEFB136, DEFB135, DEFB134, DEFB130A, DEFB130B, ZNF705D, LOC392196, USP17L7, FAM66D, USP17L2
chr8:2,697,468-3,464,962	CN Loss	3	1.6	6	18.7	0.0451158	CSMD1
chr8:20,084,158-20,110,617	CN Loss	3	1.6	6	18.7	0.0451158	LZTS1
chr8:21,550,655-21,639,974	CN Loss	3	1.6	6	18.7	0.0451158	GFRA2
chr8:24,813,738-24,833,407	CN Loss	3	1.6	6	18.7	0.0451158	NEFL
chr8:37,791,735-38,010,045	CN Loss	3	1.6	6	18.7	0.0451158	GOT1L1, ADRB3, EIF4EBP1, ASH2L, STAR
chr18:61,365,101-61,747,443	CN Loss	5	6	4	22.4	0.0485453	SERPINB11, SERPINB7, SERPINB2, SERPINB10, HMSD, SERPINB8, LINC00305
chr19:22,113,051-23,414,477	CN Loss	5	6	4	22.4	0.0485453	ZNF208, ZNF257, ZNF676, ZNF729, ZNF98, LOC101929124, LINC01233, GOLGA2P9, LOC100996349, LINC01785, ZNF492, ZNF99, ZNF723, ZNF728, LINC01859, LINC01858, ZNF730, ZNF724
chr1:148,592,790-148,594,489	CN Gain	4	22.4	5	6	0.0485453	NBPF15, NBPF25P
chr1:241,929,503-242,035,236	CN Gain	4	22.4	5	6	0.0485453	WDR64, EXO1
chr17:65,850,714-66,872,661	CN Gain	4	22.4	5	6	0.0485453	BPTF, C17orf58, KPNA2, LINC00674, ARHGAP27P2, AMZ2, SLC16A6, ARSG, MIR635, WIPI1, PRKAR1A, FAM20A, LINC01482, ABCA8
chr17:67,304,325-67,528,480	CN Gain	4	22.4	5	6	0.0485453	ABCA5, LOC105371880, MAP2K6
chr2:42,438,971-42,473,385	CN Gain	4	22.4	5	6	0.0485453	EML4
chr6:2,626,842-3,167,527	CN Gain	4	22.4	5	6	0.0485453	LINC01600, LINC02521, MYLK4, WRNIP1, SERPINB1, MIR4645, SERPINB9P1, LOC101927730, SERPINB9, SERPINB6, LINC01011, NQO2, HTATSF1P2, LOC101927759, RIPK1, BPHL, TUBB2A
chr1:118,753,982-119,427,510	CN Loss	4	22.4	5	6	0.0485453	TBX15
chr14:25,101,774-25,103,178	CN Loss	4	22.4	5	6	0.0485453	GZMB
chr19:16,146,525-16,146,594	CN Loss	4	22.4	5	6	0.0485453	LINC00905
chr19:55,009,452-55,107,595	CN Loss	4	22.4	5	6	0.0485453	LAIR2, KIR3DX1, LILRA2, LILRA1
chr22:42,522,571-42,611,105	CN Loss	4	22.4	5	6	0.0485453	LOC101929829, CYP2D6, CYP2D7, TCF20
chr4:100,570,701-100,575,328	CN Loss	4	22.4	5	6	0.0485453	LOC285556
chr8:2,038,377-2,170,862	CN Loss	4	1.6	5	22.4	0.0492659	MYOM2
chr1:152,192,287-152,279,602	CN Loss	6	18.7	3	1.6	0.0498792	HRNR, FLG
chr14:105,394,184-105,404,457	CN Loss	6	18.7	3	1.6	0.0498792	PLD4, AHNAK2
chr18:13,740,048-13,825,712	CN Loss	3	1.6	6	18.7	0.0498792	RNMT, MC5R
chr18:15,210,001-15,254,395	CN Loss	3	1.6	6	18.7	0.0498792
chr18:6,824,749-7,070,979	CN Loss	3	1.6	6	18.7	0.0498792	ARHGAP28, LINC00668, LOC101927188, LAMA1
chr2:106,970,036-106,987,516	CN Loss	3	1.6	6	18.7	0.0498792
chr2:21,365,800-21,426,461	CN Loss	3	1.6	6	18.7	0.0498792	TDRD15
chr22:18,658,795-18,734,127	CN Loss	3	1.6	6	18.7	0.0498792	USP18, LOC105379550, LOC100996415, LINC01662
